1 **Using Haplotype and QTL Analysis to Fix Favorable Alleles in Diploid Potato Breeding**

2

3 Lin Song, Jeffrey B. Endelman (ORCID 0000-0003-0957-4337)

4

5 Department of Horticulture, University of Wisconsin-Madison, Madison, WI 53706, USA

6

7 \*corresponding author

8 Email: [endelman@wisc.edu](mailto:endelman@wisc.edu)

9

10

11 **Core Ideas**

12 1. Partially inbred, diploid potato lines were developed for transitioning to an inbred-hybrid  
13 breeding system.

14 2. Multi-generational linkage analysis was used to track and fix favorable alleles without  
15 haplotype-specific markers.

16 3. Signatures of gametic and zygotic selection were detected by maximum likelihood.

17

18

19

20 Abbreviations: BC, backcross; *CDF1*, *Cycling DOF Factor 1*; DH, dihaploid; *Sli*, *S-locus*

21 inhibitor; SI, self-incompatibility; TPS, true potato seed

## 22 **Abstract**

23 At present, the potato of international commerce is autotetraploid, and the complexity of this  
24 genetic system creates limitations for breeding. Diploid potato breeding has long been used for  
25 population improvement, and thanks to improved understanding of the genetics of gametophytic  
26 self-incompatibility, there is now sustained interest in the development of uniform F<sub>1</sub> hybrid  
27 varieties based on inbred parents. We report here on the use of haplotype and QTL analysis in a  
28 modified backcrossing (BC) scheme, using primary dihaploids of *S.tuberosum* as the recurrent  
29 parental background. In Cycle 1 we selected XD3-36, a self-fertile F<sub>2</sub> clone homozygous for the  
30 self-compatibility gene *Sli*. Signatures of gametic and zygotic selection were observed at  
31 multiple loci in the F<sub>2</sub> generation, including *Sli*. In the BC<sub>1</sub> cycle, an F<sub>1</sub> population derived from  
32 XD3-36 showed a bimodal response for vine maturity, which led to the identification of late vs.  
33 early alleles in XD3-36 for the gene *StCDF1* (*Cycling DOF Factor 1*). Greenhouse phenotypes  
34 and haplotype analysis were used to select a vigorous and self-fertile F<sub>2</sub> individual with 43%  
35 homozygosity, including for *Sli* and the early-maturing allele *StCDF1.3*. Partially inbred lines  
36 from the BC<sub>1</sub> and BC<sub>2</sub> cycles have been used to initiate new cycles of selection, with the goal of  
37 reaching higher homozygosity while maintaining plant vigor, fertility, and yield.

## 38 **Introduction**

39 In the 20th century, worldwide production and breeding of potato (*Solanum tuberosum* L.)  
40 was focused on autotetraploid ( $2n=4x=48$ ) germplasm. During this time, there was also  
41 significant "pre-breeding" at the diploid level, primarily to facilitate the use of wild and  
42 cultivated germplasm from the Andean region of South America, where the potato was first  
43 domesticated. The culmination of diploid breeding was the transfer of beneficial alleles into  
44 tetraploid germplasm through  $2x-4x$  crosses (i.e., unilateral sexual polyploidization), rather than  
45 clonal selection for variety release (Hougas & Peloquin, 1958; Chase, 1963) Inbreeding  
46 depression was well known in diploid potato (de Jong & Rowe, 1971), and tetraploidy offered  
47 more opportunities for complementation; this was called selection for "maximum heterozygosity"  
48 (Bingham, 1980). Based on this prevailing wisdom, 20<sup>th</sup> century efforts to develop potato  
49 cultivars that can be propagated sexually (i.e., by "true" potato seed, TPS) utilized tetraploid  
50 rather than diploid germplasm (Golmirzaie et al., 1994).

51 *S. tuberosum* Group Andigenum diploids and many wild species exhibit gametic self-  
52 incompatibility (SI), in which S-RNase expressed in the pistil inhibits the growth of self-pollen  
53 tubes (Kubo et al., 2010). For nonself pollen, the S-RNase is targeted for degradation by F-box  
54 proteins, creating sexual compatibility. Despite the widespread presence of SI in diploid potato,  
55 self-compatible clones have been recognized and studied (Cipar, 1964; Olsder & Hermesen, 1976).  
56 Hosaka and Hanneman (1998) mapped the genetic locus underlying this self-compatibility,  
57 named *Sli* for S-locus inhibitor, to potato chromosome 12; by contrast, the potato S-locus is on  
58 chromosome 1. Map-based cloning has shown *Sli* encodes an F-box protein (Eggers et al., 2021;  
59 Ma et al., 2021).

60 Genetic understanding of self-compatibility has led to a paradigm shift in diploid potato  
61 breeding, commonly described as "Potato 2.0" (Stokstad, 2019). No longer limited to population  
62 improvement, diploids are being used to create inbred lines and F<sub>1</sub> hybrid varieties that may  
63 eventually replace tetraploids (Phumichai et al., 2005; Lindhout et al., 2011). A diploid, inbred-  
64 hybrid breeding system offers many advantages to the current breeding system in potato: it takes  
65 less time to fix favorable alleles; marker-assisted backcrossing is possible; there is greater  
66 genetic variance for selection; and heterosis can be exploited systematically (Jansky et al., 2016).  
67 As mentioned already, inbreeding depression is a significant obstacle to realizing these goals, but  
68 compared to previous generations of breeders, genomics and computational tools are now

69 available to expedite the identification and elimination of deleterious alleles (Zhang et al., 2019,  
70 2021).

71 The University of Wisconsin-Madison potato breeding program was initiated in the 1930's  
72 and has released a number of commercially successful tetraploid varieties during its history,  
73 particularly for the round white, potato chip market. Between 2016 and 2018, elite clones from  
74 the program were crossed as female parents with the haploid inducer IVP101 (Hutten et al., 1993)  
75 to generate dihaploid (diploid haploid, DH) founders for breeding. After screening hundreds of  
76 dihaploids under greenhouse conditions for vigor and female fertility, a handful have been used  
77 in a generalized backcrossing scheme (Fig. 1), to introduce *Sli* and other desirable traits into a  
78 more elite background. We report here on the outcomes of this breeding effort. A distinguishing  
79 feature of our approach has been the use of multi-generational linkage analysis to track identical-  
80 by-descent (IBD) haplotypes from the founders (Zheng et al., 2015). This allowed us to make  
81 rapid progress for fixation of *Sli* and early maturity at *CDF1* (*Cycling DOF Factor 1*;  
82 Kloosterman et al., 2013), even in the absence of haplotype-specific markers.

83

84

## 85 **Materials and Methods**

### 86 *Nomenclature*

87 Germplasm created during this research was named following the convention that a dash  
88 indicates generations separated by one meiosis during inbreeding, e.g., [Cross]-[F1]-[F2]-[F3].  
89 Dihaploid progeny of tetraploid clones are labeled [Clone]-DH[ID]. The founder US-W4  
90 (Peloquin & Hougas, 1960) does not follow this convention because it is legacy germplasm. The  
91 prefix “W2x” indicates “Wisconsin diploid” germplasm.

92

### 93 *Phenotyping*

94 Unreplicated greenhouse experiments were conducted at the Walnut Street facility at the  
95 University of Wisconsin-Madison (Madison, WI). True potato seeds (TPS) were soaked for 24 h  
96 in 1500 ppm Gibberellic Acid to break dormancy before sowing in flats. Seedlings were  
97 transplanted into 3.8L pots approximately 28 days after planting (DAP). Environmental  
98 conditions were a 16h day/8h night photoperiod, with daytime temperatures 18–22°C and  
99 nighttime temperatures 16–20°C. Five traits were measured: pollen shed, vine maturity, stolon

100 production, tuber yield, and seed (TPS) yield. Pollen shed was scored as a binary trait based on  
101 visual observation after self-pollinating at least 10 flowers per plant. Vine maturity was visually  
102 rated on a scale of 1 (early) to 9 (late) at 144 DAP. Stolon production was visually rated on a  
103 scale of 1 (few) to 5 (abundant) at harvest 150 DAP. Tuber yield was the total tuber weight (g)  
104 per plant. Seed yield was the number of seeds per plant.

105 Field evaluation of the BC<sub>1</sub>F<sub>1</sub> population occurred at the UW-Madison Hancock  
106 Agricultural Research Station (HARS) (Hancock, WI) in 2019. A partially replicated, incomplete  
107 block design was used, with a single plot for 89 progeny and two plots for 9 progeny and both  
108 parents. Eight seed pieces per plot were planted April 30 and harvested 122 DAP, two weeks  
109 after vine desiccation with diquat. Fertilization, irrigation, and pest management followed  
110 standard practice (Bussan et al., 2015). Vine maturity was visually rated using the same 1–9  
111 scale at 100 DAP. Yield was calculated on a per plant basis by dividing the plot weight by the  
112 stand count. Size A tubers (diameter > 4.8 cm) were separated using a chain grader to report the  
113 A-size proportion on a weight basis.

114 Ten tubers were stored at 7°C, 95% RH for 3 mo before measuring post-harvest quality  
115 traits. Specific gravity was measured based on underwater weight (Wang et al., 2017). Fry color  
116 was measured on 1 mm chip slices, fried for 2 min and 10 s at 360F. Chips were crushed before  
117 measuring reflectance on the Hunter Lightness scale (L) with a HunterLab D25NC colorimeter  
118 (Reston, VA).

119 Five tubers were stored at 12°C, 95% RH for 10 weeks before the start of a 16-week  
120 experiment to measure tuber dormancy. Every 2 weeks, tubers were individually scored using a  
121 3-point scale for the length of sprouts: 0 = none, 0.5 = less than 2mm, and 1 = above 2mm. The  
122 average of the five tubers was the dormancy score for each plot, and the relative area under the  
123 sprout vs. time curve (AUC) was calculated on a 0-1 scale.

124

## 125 ***Genotyping***

126 Two different platforms were used to obtain genome-wide markers in this project. For  
127 tracking IBD haplotypes across the breeding cycles, we used version 3 of the potato SNP array  
128 (Felcher et al., 2012; Vos et al., 2015), which generated 10,322 markers. As part of an  
129 experimental project on genotyping-by-sequencing (GBS) in potato, the BC<sub>1</sub>F<sub>1</sub> population was  
130 genotyped at the University of Minnesota Genomics Center (UMGC) with a two-enzyme (MspI

131 + PstI) protocol (Poland et al., 2012). Approximately 130M reads were obtained with the  
132 Illumina NextSeq 1x150 bp platform, and variant discovery was performed by the genotyping  
133 service provider using FreeBayes (Garrison & Marth, 2012) and the DMv4.03 reference genome  
134 (Potato Genome Sequencing Consortium, 2011; Sharma et al., 2013). Variant filtering was  
135 performed using custom R scripts (R Core Team, 2022). Only bi-allelic SNPs with a minimum  
136 sample depth of 10 reads, less than 10% missing data, and minor allele frequency > 0.05 were  
137 retained, yielding 7673 markers. Genotype calls were made using R package *updog* with the “f1”  
138 model to account for allelic bias and overdispersion (Gerard et al., 2018).

139 KASP genotyping with marker *Sli\_898* (Clot et al., 2020; Kaiser et al., 2021) was used to  
140 confirm *Sli* genotypes inferred from the haplotype analysis. The protocol of Kaiser et al. (2021)  
141 was followed using the KASP v4.0 2x standard ROX Master Mix (LGC Genomics, Beverly, MA)  
142 and detection with the Bio-Rad CFX96 equipment.

143 Whole-genome sequencing of the BC<sub>1</sub>F<sub>2</sub> individual W2x001-22-45 utilized the NovaSeq  
144 2x150 flow cell (University of Minnesota), with a yield of 376M paired reads. Reads were  
145 aligned with BWA-MEM (Li, 2013) to the *CDF1.1\_scaffold1389* and *CDF1.3\_scaffold390*  
146 alleles from the Atlantic reference genome (Hoopes et al., 2022) and then filtered to remove  
147 alignments with fewer than 10 bp on both sides of the transposon insertion site (Caraza-Harter &  
148 Endelman, 2022). Only alignments to the *CDF1.3* reference were detected, confirming  
149 homozygosity for this allele.

150

### 151 ***Genetic analysis***

152 Multi-generational tracking of IBD haplotypes was conducted using the SNP array marker  
153 data and the software RABBIT (Zheng et al. 2015; 2018), with marker order based on the  
154 DMv6.1 reference genome (Pham et al., 2020). First, we analyzed the Cycle 1 genotypes, using  
155 the RABBIT MagicImpute function to phase US-W4 and M19 as outbred founders. This analysis  
156 generated a phased genotype for their F<sub>1</sub> offspring XD3, which was then used as one of three  
157 founders—the others being Lelah-DH12 and W13069-DH26 (Fig. 1)—to analyze all three  
158 breeding cycles together (Files S2 and S3). Based on the haplotype reconstruction of XD3 in  
159 terms of M19 and US-W4, all individuals were reconstructed in terms of 6 founder haplotypes:  
160 M19, US-W4, Lelah-DH12.1, Lelah-DH12.2, W13069-DH26.1, W13069-DH26.1, where “.1”

161 and “.2” refer to the two haplotypes in an outbred diploid. The maximum posterior genotypes are  
162 in File S4.

163 Signatures of gametic and zygotic selection in the Cycle 1 F<sub>2</sub> population were detected using  
164 maximum likelihood (ML). Two models of gametic selection were considered, based on whether  
165 one (gametic1) or both (gametic2) sexes experience selection. The selection coefficient  $s$   
166 quantifies the strength of selection, with positive (negative) values representing selection against  
167 the A (B) allele. Two models of zygotic selection were considered, based on whether one or both  
168 homozygotes experience selection. Under the zygotic1 model, positive (negative) values of  $s$   
169 represent selection against AA (BB). Under the zygotic2 model, positive (negative) values of  $s$   
170 represent selection against (for) the homozygotes. By specifying that  $s$  equals the sum of the  
171 absolute deviations between the expected (without selection) and observed frequencies, we  
172 derived the expected frequency  $p$  of the three possible genotypes (AA, AB, BB) for the four  
173 selection models (Table 1). If  $N_{AA}$ ,  $N_{AB}$ ,  $N_{BB}$  represent the observed counts of each genotype, the  
174 log-likelihood (LL) of this outcome is  $N_{AA} \log p_{AA} + N_{AB} \log p_{AB} + N_{BB} \log p_{BB}$ . R function  
175 *optimize* was used to identify the ML solution for  $s$  for each model, and the model with the  
176 highest LL was selected for each marker (File S5). The likelihood ratio (i.e., Wilks) test was used  
177 to compute the p-value for the null hypothesis of no selection:  $s = 0$ . A Bonferroni-corrected  
178 significance threshold of  $0.05/m$  was used for detection, where  $m$  is the total number of markers.

179 QTL mapping was conducted for the BC<sub>1</sub>F<sub>1</sub> W2x001 population with R package diaQTL  
180 (Amadeu et al., 2021). The recommended settings from the package tutorial were used for the  
181 number of iterations, and the discovery threshold for the single QTL scan was based on a  
182 genome-wide significance level  $\alpha = 0.05$ . Phasing of the outbred parents and haplotype  
183 reconstruction of 132 progeny were performed using *PolyOrigin* (Zheng et al., 2021; File S6  
184 contains the input marker data), with the following parameters: *isphysmap=true*, *recomrate=1.25*,  
185 *refineorder=false*, *refinemap=true*. *PolyOrigin* did not produce sensible results for chromosome  
186 11 because it was completely homozygous in one parent, so RABBIT was used instead. The  
187 genotype probability input file for diaQTL (File S7) was generated from the *PolyOrigin* and  
188 RABBIT outputs using the functions *convert\_polyorigin* and *convert\_rabbit*, respectively, in the  
189 diaQTL package.



190 The phenotypes for QTL mapping (File S8) come from the unreplicated greenhouse and  
191 partially replicated field experiments described above. For traits in the field trial, fixed effect  
192 estimates for genotype ( $g_i$ ) were used as the response variable, based on Eq. 1:

$$193 \quad y_{ij} = \mu + g_i + b_j + \varepsilon_{ij} \quad [1]$$

194 In Eq.1,  $y_{ij}$  is the response for genotype  $i$  in block  $j$ ,  $\mu$  is the population mean,  $b_j$  is the fixed  
195 effect for block, and  $\varepsilon_{ij}$  is the residual with variance  $\sigma_\varepsilon^2$ . Variance components were estimated  
196 using ASReml-R (Butler et al., 2018). Eq. 1 was also used to estimate broad-sense heritability  
197 ( $H^2$ ) on a plot basis by treating the genotype effect as random with variance  $\sigma_g^2$ :

$$198 \quad H^2 = \frac{\sigma_g^2}{\sigma_g^2 + \sigma_\varepsilon^2} \quad [2]$$

199

200

## 201 **Results**

### 202 *Cycle 1*

203 Cycle 1 was initiated with the goal of identifying a fertile  $F_2$  clone homozygous for *Sli*, to be  
204 used as the male parent in a generalized backcrossing scheme with *S. tuberosum* dihaploids  
205 (Fig. 1). The grandparents of the  $F_2$  population were an “heirloom” *S. tuberosum* dihaploid US-  
206 W4 (Peloquin & Hougas, 1960) and an inbred clone M19 from the wild species *S. chacoense*  
207 (Fulladolsa et al., 2019). At that time (2018), it was believed that introgression of *Sli* from *S.*  
208 *chacoense* into *S. tuberosum* was necessary, and thus our strategy was to identify self-fertile  $F_2$   
209 clones homozygous for the M19 haplotype in the vicinity of the published location of *Sli* on  
210 chromosome 12. To our surprise, there were no offspring homozygous for M19 in this region  
211 (Fig. 2). The ratio of US-W4 homozygotes to heterozygotes was approximately 1:1, which is  
212 consistent with self-fertilization only by pollen containing *Sli* on the US-W4 haplotype. This  
213 interpretation was corroborated by Clot et al. (2020), who identified kmers linked to *Sli* and  
214 reported their presence in US-W4, along with many other *S. tuberosum* clones.

215 Several other genomic regions displayed signatures of selection in the Cycle 1  $F_2$  population  
216 (Fig. 2). Maximum likelihood was used to categorize distorted segregation into one of four  
217 possible selection models: gametic selection on one sex (gametic1), gametic selection on both  
218 sexes (gametic2), zygotic selection on one homozygote (zygotic1), and zygotic selection on both



219 homozygotes (zygotic2). Zygotic selection against both homozygotes was the most common  
220 inference, although in some regions multiple selection models were significant (Table S1).

221 The F<sub>2</sub> individual, XD3-36, was selected as a male parent for the first backcross (BC<sub>1</sub>) cycle  
222 based on its desirable combination of traits: good tuber yield (not recorded), seed production  
223 (340 seeds), and homozygosity for *Sli*. The *Sli* genotype was originally inferred based on  
224 haplotype analysis (Fig. 3) and later confirmed using KASP markers developed by Clot et al.  
225 (2020).

226

### 227 **Cycle BC<sub>1</sub>**

228 Several BC<sub>1</sub>F<sub>1</sub> populations were created from different dihaploid mothers, but population  
229 W2x001 from Lelah-DH12 was singled out for more intensive study. Visual ratings for vine  
230 maturity and stolon production were correlated and exhibited bimodal distributions (Fig. S1).  
231 There were 29 plants with abundant pollen shed, and 16 produced fruit upon selfing. The number  
232 of seeds among the self-fertile plants was skewed, with a range of 15 to 662 and median 119 (Fig.  
233 S1). Tuber yield ranged from 0 to 973g per plant, with a median of 370g. Tuber yield was  
234 significantly higher, by 245g ( $p = 6 \times 10^{-9}$ ), for the plants with pollen shed.

235 There were enough greenhouse tubers for 98 F<sub>1</sub> progeny to conduct a partially replicated,  
236 clonal field trial in 2019. A number of agronomic and quality traits were measured, with broad-  
237 sense heritability on a plot basis between 0.56 (total yield) and 0.86 (tuber dormancy; Table 2).  
238 Unlike the greenhouse study, the distribution for vine maturity was not bimodal. Total yield per  
239 plant ranged from 0.19 to 1.41 kg (median 0.73), compared to 0.47 and 0.27 kg for the parents  
240 Lelah-DH12 and XD3-36, respectively. Specific gravity and fry color lightness, which are  
241 important traits for the potato chip market, were measured after 3 mo of storage. Spec. gravity  
242 ranged from 1.050 to 1.114 (median 1.082), and fry color ranged from 33.2 to 59.3 (median  
243 48.9). Higher values of spec. gravity and fry color were positively correlated with each other ( $r =$   
244 0.59) and negatively correlated with tuber size ( $r = -0.52$  and  $-0.42$ , respectively; Fig. S2).

245 Genotyping-by-sequencing of the F<sub>1</sub> population for QTL analysis led to creation of a genetic  
246 map with 7497 markers and 1553 cM. For vine maturity, stolon production, and tuber dormancy,  
247 a QTL in the vicinity of *CDF1* on potato chromosome 5 was detected, which explained 53, 34,  
248 and 23% of the variance for those three traits, respectively (Table 3). The estimated parental  
249 haplotype effects indicated the *CDF1* allele inherited from M19 was significantly earlier than the

250 allele from US-W4 (Table 3, Fig. 4). There was no significant difference between the two  
251 haplotypes from Lelah-DH12 at *CDF1*, which suggests they carry the same allele. A binary trait  
252 locus, or BTL, was detected for pollen shed on chromosome 11, explaining 43% of the variance.  
253 The parental haplotype effects indicate this BTL is the result of allelic differences in Lelah-  
254 DH12, with the favorable allele for fertility on haplotype Lelah-DH12.1. Additional QTL for  
255 vine maturity on chromosome 1 and tuber dormancy on chromosome 7 explained 15-19%.

256 Based on the number of selfed seeds and tuber yields of the F<sub>1</sub> progeny, 17 F<sub>2</sub> families from  
257 W2x001 were selected for greenhouse evaluation. One of the best families, in terms of plant  
258 vigor and female self-fertility, was derived from W2x001-22. Haplotype analysis of the F<sub>2</sub>  
259 population revealed no homozygotes of the Lelah-DH12 haplotype at the *Sli* locus (Fig. S3),  
260 which indicates this haplotype in W2x001-22 did not carry *Sli*. To achieve homozygosity for  
261 early maturity and *Sli*, we selected F<sub>2</sub> progeny homozygous for the US-W4 haplotype at *Sli* and  
262 homozygous for the M19 haplotype at *CDF1*. One particular F<sub>2</sub> individual, W2x001-22-45, met  
263 these criteria and had good tuber yield and self-fertility (Fig. 3 and 5). Homozygosity varied by  
264 chromosome from a low of 2% on chr01 to 99.9% on chr04, with a genome-wide average of 43%  
265 (Table 4 and Fig. S4).

266 Whole-genome sequencing of W2x001-22-45 was used to determine which *CDF1* allele is  
267 present. As expected, only one allele was detected: *CDF1.3*, which is the earliest known allele  
268 and encodes a truncated protein without the FKF1 binding domain (Kloosterman et al., 2013).

269

## 270 **Cycle BC<sub>2</sub>**

271 Cycle BC<sub>2</sub> was initiated by using two superior BC<sub>1</sub>F<sub>1</sub> individuals, W2x001-22 and W2x001-  
272 84, as pollen donors to fertilize *S. tuberosum* dihaploids. Both selfing and sib-mating of BC<sub>2</sub>F<sub>1</sub>  
273 individuals were used for inbreeding, and one F<sub>2</sub> population derived from sib-mating W2x082-14  
274 and W2x082-20 had particularly good characteristics (Fig. 1). Haplotype analysis in the F<sub>2</sub>  
275 generation enabled genetic selection for homozygosity at *CDF1* and *Sli* (Fig. 3) and phenotypic  
276 selection for tuber and (selfed) F<sub>3</sub> seed yield. The top F<sub>3</sub> population derived from the F<sub>2</sub>  
277 individual W2x082-(14/20)-13, which was later determined to be only 11% homozygous—well  
278 below the expected value of 25% for a sib-mated F<sub>2</sub>. Tuber yield and homozygosity were  
279 inversely related ( $r = -0.40$ ,  $p < 0.05$ ) in the F<sub>3</sub> population (Fig. S5), while seed and tuber yields  
280 were positively correlated ( $r = 0.55$ ,  $p < 0.05$ ). Our top F<sub>3</sub> selection, W2x082-(14/20)-13-2 (Fig.

281 S6), had a bimodal distribution for homozygosity across the 12 chromosomes, with 4  
282 chromosomes above 85% and 6 below 15% (Table 4). The genome-wide average of 43%  
283 homozygosity for W2x082-(14/20)-13-2 was comparable to the top selection in the BC<sub>1</sub>F<sub>2</sub>  
284 generation, W2x001-22-45.

285

286

## 287 **Discussion**

288 A potential challenge with the development of inbred-hybrid varieties in potato is  
289 competition between the sexual and asexual reproductive organs as sinks for assimilates  
290 (Almekinders & Struik, 1996). The potato tuberization pathway is the result of  
291 neofunctionalization of the flowering pathway, with the phloem-mobile signal for tuberization  
292 SP6A homologous to the florigen signal SP3D (Navarro et al., 2011; Abelenda et al., 2014).  
293 Both proteins are regulated by CDF1, and the two processes typically occur contemporaneously.  
294 To promote flowering, it is common practice in potato breeding to plant mother tubers on a brick  
295 for crossing, so that the soil can be washed away after the roots are established and daughter  
296 tubers removed (Thijn, 1954). However, not all genotypes respond to this treatment (Plantenga et  
297 al., 2019), and we observed a *positive* correlation between seed and tuber yield in both the BC<sub>1</sub>F<sub>1</sub>  
298 and BC<sub>2</sub>F<sub>3</sub> generations (Figures S2 and S5). Since both traits are likely to benefit from increased  
299 plant vigor, this may be expected when there is inbreeding depression. More research is needed  
300 to understand the conditions under which flowering and tuberization are antagonistic.

301 One of our goals during inbreeding was to select for homozygosity of the haplotype  
302 containing an early maturing allele at *CDF1*. It was only years later that we determined the allele  
303 was *CDF1.3* from whole-genome sequencing. Ramírez Gonzales et al. (2021) also generated  
304 diploids homozygous for *CDF1.3*, reporting they were “extremely weak with a stunted growth  
305 habit.” This observation was rationalized based on their discovery that the transposon insertion in  
306 *CDF1.3* disrupts the long non-coding RNA *StFLORE*, which is anti-sense to the *CDF1* transcript  
307 and helps to regulate stomatal opening. We did not observe a deleterious phenotype associated  
308 with homozygosity of *CDF1.3* in either the BC<sub>1</sub> or BC<sub>2</sub> cycle, so further research is needed to  
309 understand whether this is due to compensatory alleles in our germplasm. The W2x001-22-45  
310 clone has been deposited with the US Potato Genebank (accession id ‘BS 451’) for other  
311 breeders and researchers to use.

312           Historically, the conventional wisdom in potato breeding was that diploid germplasm was  
313 useful for population improvement but not for the release of commercial varieties, primarily  
314 because of limitations for tuber size and yield. Following a decade of breeding for inbred  
315 diploids, a yield gap between diploid F<sub>1</sub> hybrids and tetraploids was still evident in the  
316 publication by Stockem et al. (2020). This result is not too surprising given the significant  
317 inbreeding depression observed in potato (de Jong & Rowe, 1971; Zhang et al., 2019). In the  
318 case of maize, it took multiple decades before commercially viable F<sub>1</sub> hybrids were developed  
319 (Duvick, 2005), and a higher density of deleterious alleles is expected for cultivated potato  
320 compared to maize (Hardigan et al., 2017; Hoopes et al., 2022). On the bright side, the current  
321 study and Zhang et al. (2021) have shown that genetics and genomics can be used to guide and  
322 accelerate inbreeding. We remain optimistic that inbred-hybrid varieties will eventually replace  
323 tetraploid clones.  
324

325 **Supplemental Material**

- 326 File S1. Supplemental Table and Figures.  
327 File S2. Marker genotype data for RABBIT.  
328 File S3. Pedigree data for RABBIT.  
329 File S4. RABBIT haplotype reconstruction results.  
330 File S5. R function to detect signatures of selection in F<sub>2</sub> populations.  
331 File S6. Marker genotype data for W2x001 for PolyOrigin.  
332 File S7. Genotype probabilities for W2x001 for diaQTL.  
333 File S8. Phenotype data for W2x001 for diaQTL.  
334

335 **Author Contributions**

- 336 LS: Investigation, Formal analysis, Writing – original draft, review and editing. JBE:  
337 Supervision, Investigation, Formal analysis, Writing – review and editing.  
338

339 **Acknowledgments**

- 340 We thank Grace Christensen for assistance with tissue culture and other lab protocols, Peyton  
341 Sorensen for dihaploid extraction, staff from the Rhinelander and Hancock Agricultural Research  
342 Stations, the UW-Madison Walnut Street Greenhouse Facility, and the Douches Lab for *Sli*  
343 KASP reagents. Financial support was provided by the USDA National Institute of Food  
344 Agriculture Award 2019-51181-30021.

345

346 **Data Availability**

- 347 SNP marker and phenotype data are provided as supplemental files. Whole-genome sequence  
348 data for W2x001-22-45 is available from the NCBI Sequence Read Archive under BioProject ID  
349 PRJNA898285 (<https://www.ncbi.nlm.nih.gov/bioproject/898285>).

## 350 References

- 351 Abelenda, J.A., Navarro, C., & Prat, S. (2014). Flowering and tuberization: a tale of two  
352 nightshades. *Trends in Plant Science*, *19*, 115–122.  
353 <https://doi.org/10.1016/j.tplants.2013.09.010>
- 354 Almekinders, C.J.M., & Struik, P.C. (1996). Shoot development and flowering in potato  
355 (*Solanum tuberosum* L.). *Potato Research*, *39*, 581–607.  
356 <https://doi.org/10.1007/BF02358477>
- 357 Amadeu, R.R., Muñoz, P.R., Zheng, C., & Endelman, J.B. (2021). QTL mapping in outbred  
358 tetraploid (and diploid) diallel populations. *Genetics*, *219*.  
359 <https://doi.org/10.1093/genetics/iyab124>
- 360 Bingham, E.T. (1980). Maximizing Heterozygosity in Autopolyploids. *Polyploidy* (pp. 471–489).  
361 Springer US, Boston, MA.
- 362 Bussan, A.J., Colquhoun, J.B., Cullen, E.M., Davis, V.M., Gevens, A., Groves, R.L., Heider,  
363 D.J., Nice, G., & Ruark, M. (2015). *Commercial Vegetable Production in Wisconsin*.  
364 University of Wisconsin-Extension, Madison, WI.
- 365 Butler, D.G., Cullis, B.R., Gilmour, A.R., Gogel, B.J., & Thompson, R. (2018). ASReml-R  
366 Reference Manual Version 4. *ASReml-R Reference Manual Version 4*,
- 367 Caraza-Harter, M. v., & Endelman, J.B. (2022). The genetic architectures of vine and skin  
368 maturity in tetraploid potato. *Theoretical and Applied Genetics*, *135*, 2943–2951.  
369 <https://doi.org/10.1007/s00122-022-04159-z>
- 370 Chase, S.S. (1963). ANALYTIC BREEDING IN *SOLANUM TUBEROSUM* L. – A SCHEME  
371 UTILIZING PARTHENOTES AND OTHER DIPLOID STOCKS. *Canadian Journal of*  
372 *Genetics and Cytology*, *5*, 359–363. <https://doi.org/10.1139/g63-049>
- 373 Cipar, M.S. (1964). Self-compatibility in hybrids between Phureja and haploid Andigena clones  
374 of *Solanum tuberosum*. *European Potato Journal*, *7*, 152–160.  
375 <https://doi.org/10.1007/BF02368152>
- 376 Clot, C.R., Polzer, C., Prodhomme, C., Schuit, C., Engelen, C.J.M., Hutten, R.C.B., & van Eck,  
377 H.J. (2020). The origin and widespread occurrence of *Sli*-based self-compatibility in potato.  
378 *Theoretical and Applied Genetics*, *133*. <https://doi.org/10.1007/s00122-020-03627-8>
- 379 Duvick, D.N. (2005). The Contribution of Breeding to Yield Advances in maize (*Zea mays* L.).  
380 (pp. 83–145).
- 381 Eggers, E.-J., van der Burgt, A., van Heusden, S.A.W., de Vries, M.E., Visser, R.G.F., Bachem,  
382 C.W.B., & Lindhout, P. (2021). Neofunctionalisation of the *Sli* gene leads to self-  
383 compatibility and facilitates precision breeding in potato. *Nature Communications*, *12*.  
384 <https://doi.org/10.1038/s41467-021-24267-6>
- 385 Felcher, K.J., Coombs, J.J., Massa, A.N., Hansey, C.N., Hamilton, J.P., Veilleux, R.E., Buell,  
386 C.R., & Douches, D.S. (2012). Integration of Two Diploid Potato Linkage Maps with the  
387 Potato Genome Sequence. *PLoS ONE*, *7*, e36347.  
388 <https://doi.org/10.1371/journal.pone.0036347>
- 389 Fulladolsa, A.C., Charkowski, A., Cai, X., Whitworth, J., Gray, S., & Jansky, S. (2019).  
390 Germplasm with Resistance to Potato virus Y Derived from *Solanum chacoense*: Clones  
391 M19 (39–7) and M20 (XD3). *American Journal of Potato Research*, *96*, 390–395.  
392 <https://doi.org/10.1007/s12230-019-09719-6>
- 393 Garrison, E., & Marth, G. (2012). Haplotype-based variant detection from short-read sequencing.  
394 *arXiv*, *1207.3907*. <https://doi.org/10.48550/arXiv.1207.3907>



- 395 Gerard, D., Ferrão, L.F.V., Garcia, A.A.F., & Stephens, M. (2018). Genotyping Polyploids from  
396 Messy Sequencing Data. *Genetics*, 210, 789–807.  
397 <https://doi.org/10.1534/genetics.118.301468>
- 398 Golmirzaie, A.M., Malagamba, P., & Pallais, N. (1994). Breeding potatoes based on true seed  
399 propagation. In J.E. Bradshaw & G.R. Mackay (Eds.), *Potato Genetics* (pp. 499–513). CAB  
400 International, Wallingford, UK.
- 401 Hardigan, M.A., Laimbeer, F.P.E., Newton, L., Crisovan, E., Hamilton, J.P., Vaillancourt, B.,  
402 Wiegert-Rininger, K., Wood, J.C., Douches, D.S., Farré, E.M., Veilleux, R.E., & Buell, C.R.  
403 (2017). Genome diversity of tuber-bearing *Solanum* uncovers complex evolutionary history  
404 and targets of domestication in the cultivated potato. *Proceedings of the National Academy  
405 of Sciences*, 114. <https://doi.org/10.1073/pnas.1714380114>
- 406 Hoopes, G., Meng, X., Hamilton, J.P., Achakkagari, S.R., de Alves Freitas Guesdes, F., Bolger,  
407 M.E., Coombs, J.J., Esselink, D., Kaiser, N.R., Kodde, L., Kyriakidou, M., Lavrijssen, B.,  
408 van Lieshout, N., Shereda, R., Tuttle, H.K., Vaillancourt, B., Wood, J.C., de Boer, J.M.,  
409 Bornowski, N., Bourke, P., Douches, D., van Eck, H.J., Ellis, D., Feldman, M.J., Gardner,  
410 K.M., Hopman, J.C.P., Jiang, J., de Jong, W.S., Kuhl, J.C., Novy, R.G., Oome, S.,  
411 Sathuvalli, V., Tan, E.H., Ursum, R.A., Vales, M.I., Vining, K., Visser, R.G.F., Vossen, J.,  
412 Yencho, G.C., Anglin, N.L., Bachem, C.W.B., Endelman, J.B., Shannon, L.M., Strömviik,  
413 M. v., Tai, H.H., Usadel, B., Buell, C.R., & Finkers, R. (2022). Phased, chromosome-scale  
414 genome assemblies of tetraploid potato reveal a complex genome, transcriptome, and  
415 predicted proteome landscape underpinning genetic diversity. *Molecular Plant*, 15, 520–536.  
416 <https://doi.org/10.1016/j.molp.2022.01.003>
- 417 Hosaka, K., & E. Hanneman, Jr., R. (1998). Genetics of self-compatibility in a self-incompatible  
418 wild diploid potato species *Solanum chacoense*. 2. Localization of an S locus inhibitor (Sli)  
419 gene on the potato genome using DNA markers. *Euphytica*, 103, 265–271.  
420 <https://doi.org/10.1023/A:1018380725160>
- 421 Hosaka, K., & Hanneman, R.E. (1998). Genetics of self-compatibility in a self-incompatible wild  
422 diploid potato species *Solanum chacoense*. 1. Detection of an S locus inhibitor (Sli) gene.  
423 *Euphytica*, 99, 191–197. <https://doi.org/10.1023/A:1018353613431>
- 424 Hougas, R.W., & Peloquin, S.J. (1958). The potential of potato haploids in breeding and genetic  
425 research. *American Potato Journal*, 35, 701–707. <https://doi.org/10.1007/BF02855564>
- 426 Hutten, R.C.B., Scholberg, E.J.M.M., Huigen, D.J., Hermsen, J.G.Th., & Jacobsen, E. (1993).  
427 Analysis of dihaploid induction and production ability and seed parent x pollinator  
428 interaction in potato. *Euphytica*, 72, 61–64. <https://doi.org/10.1007/BF00023773>
- 429 Jansky, S.H., Charkowski, A.O., Douches, D.S., Gusmini, G., Richael, C., Bethke, P.C., Spooner,  
430 D.M., Novy, R.G., de Jong, H., de Jong, W.S., Bamberg, J.B., Thompson, A.L., Bizimungu,  
431 B., Holm, D.G., Brown, C.R., Haynes, K.G., Sathuvalli, V.R., Veilleux, R.E., Creighton  
432 Miller, J., Bradeen, J.M., & Jiang, J. (2016). Reinventing potato as a diploid inbred line-  
433 based crop. *Crop Science*, 56, 1412–1422. <https://doi.org/10.2135/cropsci2015.12.0740>
- 434 de Jong, H., & Rowe, P.R. (1971). Inbreeding in cultivated diploid potatoes. *Potato Research*, 14,  
435 74–83. <https://doi.org/10.1007/BF02355931>
- 436 Kaiser, N.R., Jansky, S., Coombs, J.J., Collins, P., Alsahlany, M., & Douches, D.S. (2021).  
437 Assessing the Contribution of Sli to Self-Compatibility in North American Diploid Potato  
438 Germplasm Using KASP<sup>TM</sup> Markers. *American Journal of Potato Research*, 98.  
439 <https://doi.org/10.1007/s12230-021-09821-8>



- 440 Kloosterman, B., Abelenda, J.A., Gomez, M.D.M.C., Oortwijn, M., de Boer, J.M., Kowitzanich,  
441 K., Horvath, B.M., van Eck, H.J., Smaczniak, C., Prat, S., Visser, R.G.F., & Bachem,  
442 C.W.B. (2013). Naturally occurring allele diversity allows potato cultivation in northern  
443 latitudes. *Nature*, 495, 246–250. <https://doi.org/10.1038/nature11912>
- 444 Kubo, K., Entani, T., Takara, A., Wang, N., Fields, A.M., Hua, Z., Toyoda, M., Kawashima,  
445 S., Ando, T., Isogai, A., Kao, T., & Takayama, S. (2010). Collaborative Non-Self  
446 Recognition System in S-RNase–Based Self-Incompatibility. *Science*, 330, 796–799.  
447 <https://doi.org/10.1126/science.1195243>
- 448 Li, H. (2013). Aligning sequence reads, clone sequences and assembly contigs with BWA-MEM.  
449 *arXiv*, 1303.3997. <https://doi.org/10.48550/arXiv.1303.3997>.
- 450 Lindhout, P., Meijer, D., Schotte, T., Hutten, R.C.B., Visser, R.G.F., & van Eck, H.J. (2011).  
451 Towards F1 Hybrid Seed Potato Breeding. *Potato Research*, 54, 301–312.  
452 <https://doi.org/10.1007/s11540-011-9196-z>
- 453 Ma, L., Zhang, C., Zhang, B., Tang, F., Li, F., Liao, Q., Tang, D., Peng, Z., Jia, Y., Gao, M., Guo,  
454 H., Zhang, J., Luo, X., Yang, H., Gao, D., Lucas, W.J., Li, C., Huang, S., & Shang, Y.  
455 (2021). A nonS-locus F-box gene breaks self-incompatibility in diploid potatoes. *Nature*  
456 *Communications*, 12. <https://doi.org/10.1038/s41467-021-24266-7>
- 457 Navarro, C., Abelenda, J.A., Cruz-Oró, E., Cuéllar, C.A., Tamaki, S., Silva, J., Shimamoto, K.,  
458 & Prat, S. (2011). Control of flowering and storage organ formation in potato by  
459 FLOWERING LOCUS T. *Nature*, 478. <https://doi.org/10.1038/nature10431>
- 460 Olsder, J., & Hermsen, J.G.T. (1976). Genetics of self-compatibility in dihaploids of *Solanum*  
461 *tuberosum* L. I. Breeding behaviour of two self-compatible dihaploids. *Euphytica*, 25, 597–  
462 607. <https://doi.org/10.1007/BF00041597>
- 463 Peloquin, S.J., & Hougas, R.W. (1960). Genetic variation among haploids of the common potato.  
464 *American Potato Journal*, 37, 289–297. <https://doi.org/10.1007/BF02855072>
- 465 Pham, G.M., Hamilton, J.P., Wood, J.C., Burke, J.T., Zhao, H., Vaillancourt, B., Ou, S., Jiang, J.,  
466 & Buell, C.R. (2020). Construction of a chromosome-scale long-read reference genome  
467 assembly for potato. *GigaScience*, 9. <https://doi.org/10.1093/gigascience/giaa100>
- 468 Phumichai, C., Mori, M., Kobayashi, A., Kamijima, O., & Hosaka, K. (2005). Toward the  
469 development of highly homozygous diploid potato lines using the self-compatibility  
470 controlling Sli gene. *Genome*, 48, 977–984. <https://doi.org/10.1139/g05-066>
- 471 Plantenga, F.D.M., Bergonzi, S., Abelenda, J.A., Bachem, C.W.B., Visser, R.G.F., Heuvelink, E.,  
472 & Marcelis, L.F.M. (2019). The tuberization signal StSP6A represses flower bud  
473 development in potato. *Journal of Experimental Botany*, 70, 937–948.  
474 <https://doi.org/10.1093/jxb/ery420>
- 475 Poland, J.A., Brown, P.J., Sorrells, M.E., & Jannink, J.L. (2012). Development of high-density  
476 genetic maps for barley and wheat using a novel two-enzyme genotyping-by-sequencing  
477 approach. *PLoS ONE*, 7. <https://doi.org/10.1371/journal.pone.0032253>
- 478 Potato Genome Sequencing Consortium. (2011). Genome sequence and analysis of the tuber  
479 crop potato. *Nature*, 475, 189–195. <https://doi.org/10.1038/nature10158>
- 480 R Core Team. (2022). R: A Language and Environment for Statistical Computing
- 481 Ramírez Gonzales, L., Shi, L., Bergonzi, S.B., Oortwijn, M., Franco Zorrilla, J.M.,  
482 Solano Tavira, R., Visser, R.G.F., Abelenda, J.A., & Bachem, C.W.B. (2021). Potato  
483 CYCLING DOF FACTOR 1 and its lncRNA counterpart *StFLORE* link tuber development  
484 and drought response. *The Plant Journal*, 105. <https://doi.org/10.1111/tbj.15093>

- 485 Sharma, S.K., Bolser, D., de Boer, J., Sønderkær, M., Amoros, W., Carboni, M.F., D'Ambrosio,  
486 J.M., de la Cruz, G., di Genova, A., Douches, D.S., Eguiluz, M., Guo, X., Guzman, F.,  
487 Hackett, C.A., Hamilton, J.P., Li, G., Li, Y., Lozano, R., Maass, A., Marshall, D., Martinez,  
488 D., McLean, K., Mejía, N., Milne, L., Munive, S., Nagy, I., Ponce, O., Ramirez, M., Simon,  
489 R., Thomson, S.J., Torres, Y., Waugh, R., Zhang, Z., Huang, S., Visser, R.G.F., Bachem,  
490 C.W.B., Sagredo, B., Feingold, S.E., Orjeda, G., Veilleux, R.E., Bonierbale, M., Jacobs,  
491 J.M.E., Milbourne, D., Martin, D.M.A., & Bryan, G.J. (2013). Construction of reference  
492 chromosome-scale pseudomolecules for potato: Integrating the potato genome with genetic  
493 and physical maps. *G3: Genes, Genomes, Genetics*, 3, 2031–2047.  
494 <https://doi.org/10.1534/g3.113.007153>
- 495 Stockem, J., de Vries, M., van Nieuwenhuizen, E., Lindhout, P., & Struik, P.C. (2020).  
496 Contribution and Stability of Yield Components of Diploid Hybrid Potato. *Potato*  
497 *Research*, . <https://doi.org/10.1007/s11540-019-09444-x>
- 498 Stokstad, E. (2019). The new potato. *Science*, 363, 574–577.  
499 <https://doi.org/10.1126/science.363.6427.574>
- 500 Thijn, G.A. (1954). The raising of first year potato seedlings in glasshouses. *Euphytica*, 3, 140–  
501 146. <https://doi.org/10.1007/BF00029960>
- 502 Vos, P.G., Uitdewilligen, J.G.A.M.L., Voorrips, R.E., Visser, R.G.F., & van Eck, H.J. (2015).  
503 Development and analysis of a 20K SNP array for potato (*Solanum tuberosum*): an insight  
504 into the breeding history. *Theoretical and Applied Genetics*, 128, 2387–2401.  
505 <https://doi.org/10.1007/s00122-015-2593-y>
- 506 Wang, Y., Snodgrass, L.B., Bethke, P.C., Bussan, A.J., Holm, D.G., Novy, R.G., Pavek, M.J.,  
507 Porter, G.A., Rosen, C.J., Sathuvalli, V., Thompson, A.L., Thornton, M.T., & Endelman,  
508 J.B. (2017). Reliability of measurement and genotype × environment interaction for potato  
509 specific gravity. *Crop Science*, 57, 1966–1972. <https://doi.org/10.2135/cropsci2016.12.0976>
- 510 Zhang, C., Wang, P., Tang, D., Yang, Z., Lu, F., Qi, J., Tawari, N.R., Shang, Y., Li, C., & Huang,  
511 S. (2019). The genetic basis of inbreeding depression in potato. *Nature Genetics*, 51, 374–  
512 378. <https://doi.org/10.1038/s41588-018-0319-1>
- 513 Zhang, C., Yang, Z., Tang, D., Zhu, Y., Wang, P., Li, D., Zhu, G., Xiong, X., Shang, Y., Li, C.,  
514 & Huang, S. (2021). Genome design of hybrid potato. *Cell*, 184, 3873–3883.e12.  
515 <https://doi.org/10.1016/j.cell.2021.06.006>
- 516 Zheng, C., Amadeu, R.R., Munoz, P.R., & Endelman, J.B. (2021). Haplotype reconstruction in  
517 connected tetraploid F1 populations. *Genetics*, 219.  
518 <https://doi.org/10.1093/genetics/iyab106>
- 519 Zheng, C., Boer, M.P., & van Eeuwijk, F.A. (2015). Reconstruction of Genome Ancestry Blocks  
520 in Multiparental Populations. *Genetics*, 200, 1073.  
521 <https://doi.org/10.1534/genetics.115.177873>
- 522 Zheng, C., Boer, M.P., & van Eeuwijk, F.A. (2018). Accurate Genotype Imputation in  
523 Multiparental Populations from Low-Coverage Sequence. *Genetics*, 210, 71.  
524 <https://doi.org/10.1534/genetics.118.300885>  
525

526 **TABLES**

527

528 **Table 1.** Genotype frequencies under gametic and zygotic models of selection in  $F_2$  populations.

| Genotype | gametic1                                            | gametic2                    | zygotic1                      | zygotic2                    |
|----------|-----------------------------------------------------|-----------------------------|-------------------------------|-----------------------------|
| AA       | $\frac{1}{2}\left(\frac{1}{2} - \frac{s}{2}\right)$ | $\frac{1}{4}(1 - s)^2$      | $\frac{1}{4} - f(s)$          | $\frac{1}{4} - \frac{s}{4}$ |
| AB       | $\frac{1}{2}$                                       | $\frac{1}{2}(1 - s)(1 + s)$ | $\frac{1}{2} + \frac{ s }{3}$ | $\frac{1}{2} + \frac{s}{2}$ |
| BB       | $\frac{1}{2}\left(\frac{1}{2} + \frac{s}{2}\right)$ | $\frac{1}{4}(1 + s)^2$      | $\frac{1}{4} - f(-s)$         | $\frac{1}{4} - \frac{s}{4}$ |

529 In zygotic1, the function  $f(s) = \begin{cases} s/2, & s > 0 \\ s/6, & s < 0 \end{cases}$

530 **Table 2.** Broad-sense heritability estimates (plot basis) from the field trial of the W2x001 BC<sub>1</sub>F<sub>1</sub>  
531 population.

532

| Trait            | H <sup>2</sup> |
|------------------|----------------|
| Vine Maturity    | 0.65           |
| Tuber Yield      | 0.56           |
| Tuber Size (% A) | 0.67           |
| Tuber Appearance | 0.66           |
| Specific Gravity | 0.74           |
| Fry Color        | 0.61           |
| Tuber Dormancy   | 0.86           |

533

534

535 **Table 3.** Quantitative trait loci (QTL) for the W2x001 BC<sub>1</sub>F<sub>1</sub> population.  
536

| Trait                        | -ΔDIC <sup>†</sup> | QTL Peak<br>Chr@DMv4.03 bp<br>(90% CI)  | PVE<br>(%) | Parental Haplotype Effects |       |        |        |
|------------------------------|--------------------|-----------------------------------------|------------|----------------------------|-------|--------|--------|
|                              |                    |                                         |            | Lelah-DH12                 |       | XD3-36 |        |
|                              |                    |                                         |            | 1                          | 2     | M19    | US-W4  |
| Vine<br>Maturity<br>(GH)     | 20                 | Chr1@37522047<br>(10416011... 61505229) | 15         | 0.12                       | -0.55 | 3.21*  | -2.78* |
|                              | 100.6              | Chr5@4252354<br>(3050680... 5363804)    | 53         | 0.5                        | -0.27 | -2.64* | 2.42*  |
| Stolon<br>Production<br>(GH) | 52.2               | Chr5@4540110<br>(3372444...5363804 )    | 34         | 0.1                        | -0.23 | -0.71* | 0.85*  |
| Pollen Shed<br>(GH)          | 52.6               | Chr11@7240547<br>(6240263... 9222720)   | 43         | 1.34*                      | -0.85 | -0.32  | -0.17  |
| Tuber<br>Dormancy<br>(Field) | 22.8               | Chr5@5723591<br>(3372444... 7661341)    | 23         | 0                          | 0.01  | -0.08* | 0.07   |
|                              | 17.4               | Chr7@3038086<br>(438555...6065903)      | 19         | -0.07*                     | 0.07* | 0.01   | 0      |

537 † Change in the Deviance Information Criterion. Discovery threshold was 14.1.

538 \* Allelic effects are significantly different from 0 at  $\alpha = 0.1$

539

540 **Table 4.** Homozygosity percentages (based on DMv6.1 bp) for partially inbred clones from the  
541 modified backcrossing scheme.  
542

| Chr     | XD3-36<br>Cycle 1 | W2x001-22-45<br>Cycle BC <sub>1</sub> | W2x082-(14/20)-13<br>Cycle BC <sub>2</sub> | W2x082-(14/20)-13-2<br>Cycle BC <sub>2</sub> |
|---------|-------------------|---------------------------------------|--------------------------------------------|----------------------------------------------|
| 1       | 75.1              | 2.2                                   | 0.0                                        | 0.0                                          |
| 2       | 72.5              | 63.7                                  | 0.9                                        | 36.4                                         |
| 3       | 0.0               | 50.1                                  | 6.5                                        | 72.6                                         |
| 4       | 73.5              | 99.9                                  | 2.5                                        | 88.8                                         |
| 5       | 73.8              | 22.1                                  | 93.3                                       | 96.5                                         |
| 6       | 17.0              | 22.1                                  | 0.0                                        | 99.2                                         |
| 7       | 4.2               | 7.6                                   | 0.0                                        | 0.0                                          |
| 8       | 7.1               | 71.6                                  | 0.0                                        | 9.2                                          |
| 9       | 3.4               | 16.3                                  | 6.3                                        | 12.8                                         |
| 10      | 7.0               | 74.2                                  | 10.8                                       | 92.7                                         |
| 11      | 100.0             | 75.5                                  | 0.0                                        | 1.8                                          |
| 12      | 13.8              | 13.4                                  | 8.1                                        | 11.9                                         |
| Average | 37.3              | 43.2                                  | 10.7                                       | 43.5                                         |

543

544 **FIGURE CAPTIONS**

545

546 **Figure 1.** Breeding scheme to develop partially inbred lines fixed for favorable alleles at key loci.  
547 Standard nomenclature is used: [Cross]-[F1]-[F2]-[F3]. When sib-mating of two individuals was  
548 used instead of selfing, the naming convention was (ID1/ID2).

549

550 **Figure 2.** Signatures of selection in the F<sub>2</sub> generation of Cycle 1. (Top) Homozygote frequencies.  
551 (Bottom) Hypothesis testing for zygotic and gametic selection at significance level  $\alpha = 0.05$ , with  
552 Bonferroni correction for multiple testing.

553

554 **Figure 3.** Haplotype reconstruction of key genotypes for chromosome 5, 11 and 12. White  
555 dashed lines represent the location of *CDF1* on chromosome 5, the fertility QTL on chromosome  
556 11, and *Sli* on chromosome 12. All 12 chromosomes shown in Figure S4.

557

558 **Figure 4.** Genetic mapping of greenhouse vine maturity in the BC<sub>1</sub>F<sub>1</sub> population. (Left) Single  
559 QTL genome scan. (Right) Parental haplotype effects for the QTL on chromosome 5. Higher  
560 trait values represent later maturity.

561

562 **Figure 5.** The BC<sub>1</sub>F<sub>2</sub> individual W2x001-22-45, which was selected based on vigor, self-fertility,  
563 and tuber yield in greenhouse experiments. It is homozygous for *Sli* and *CDF1.3*.



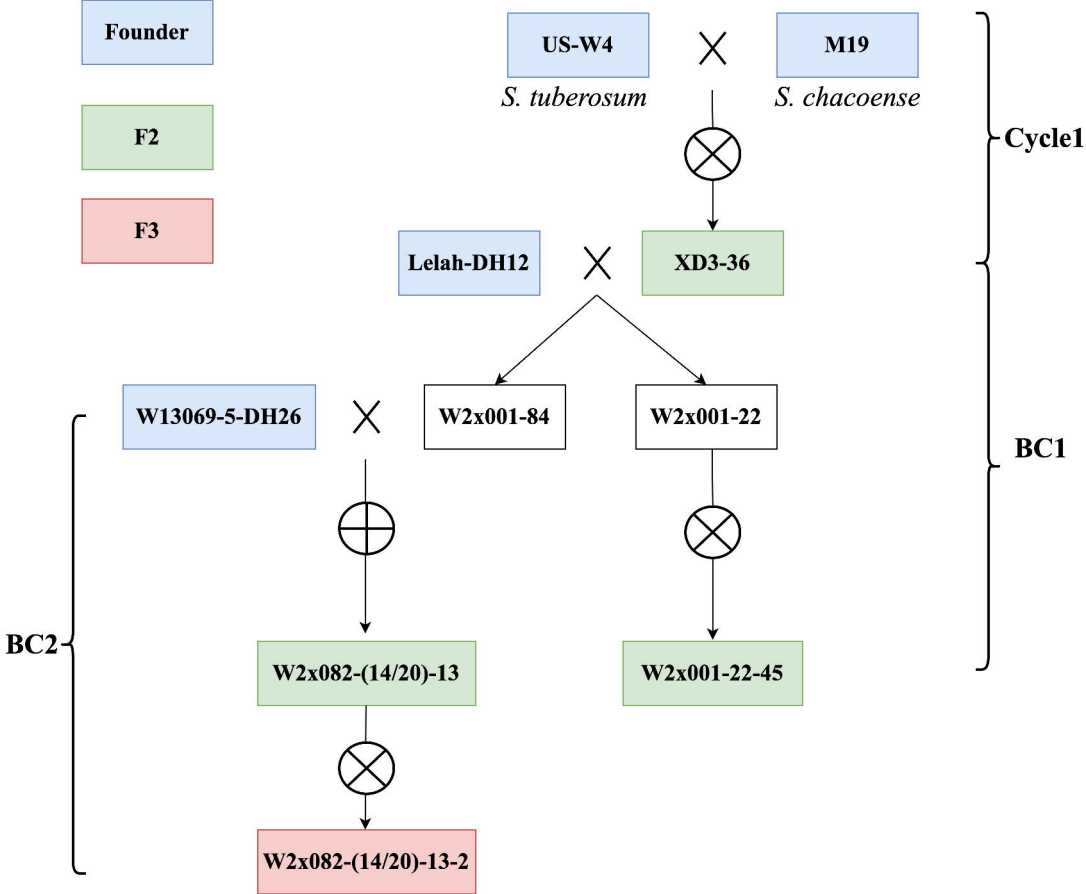

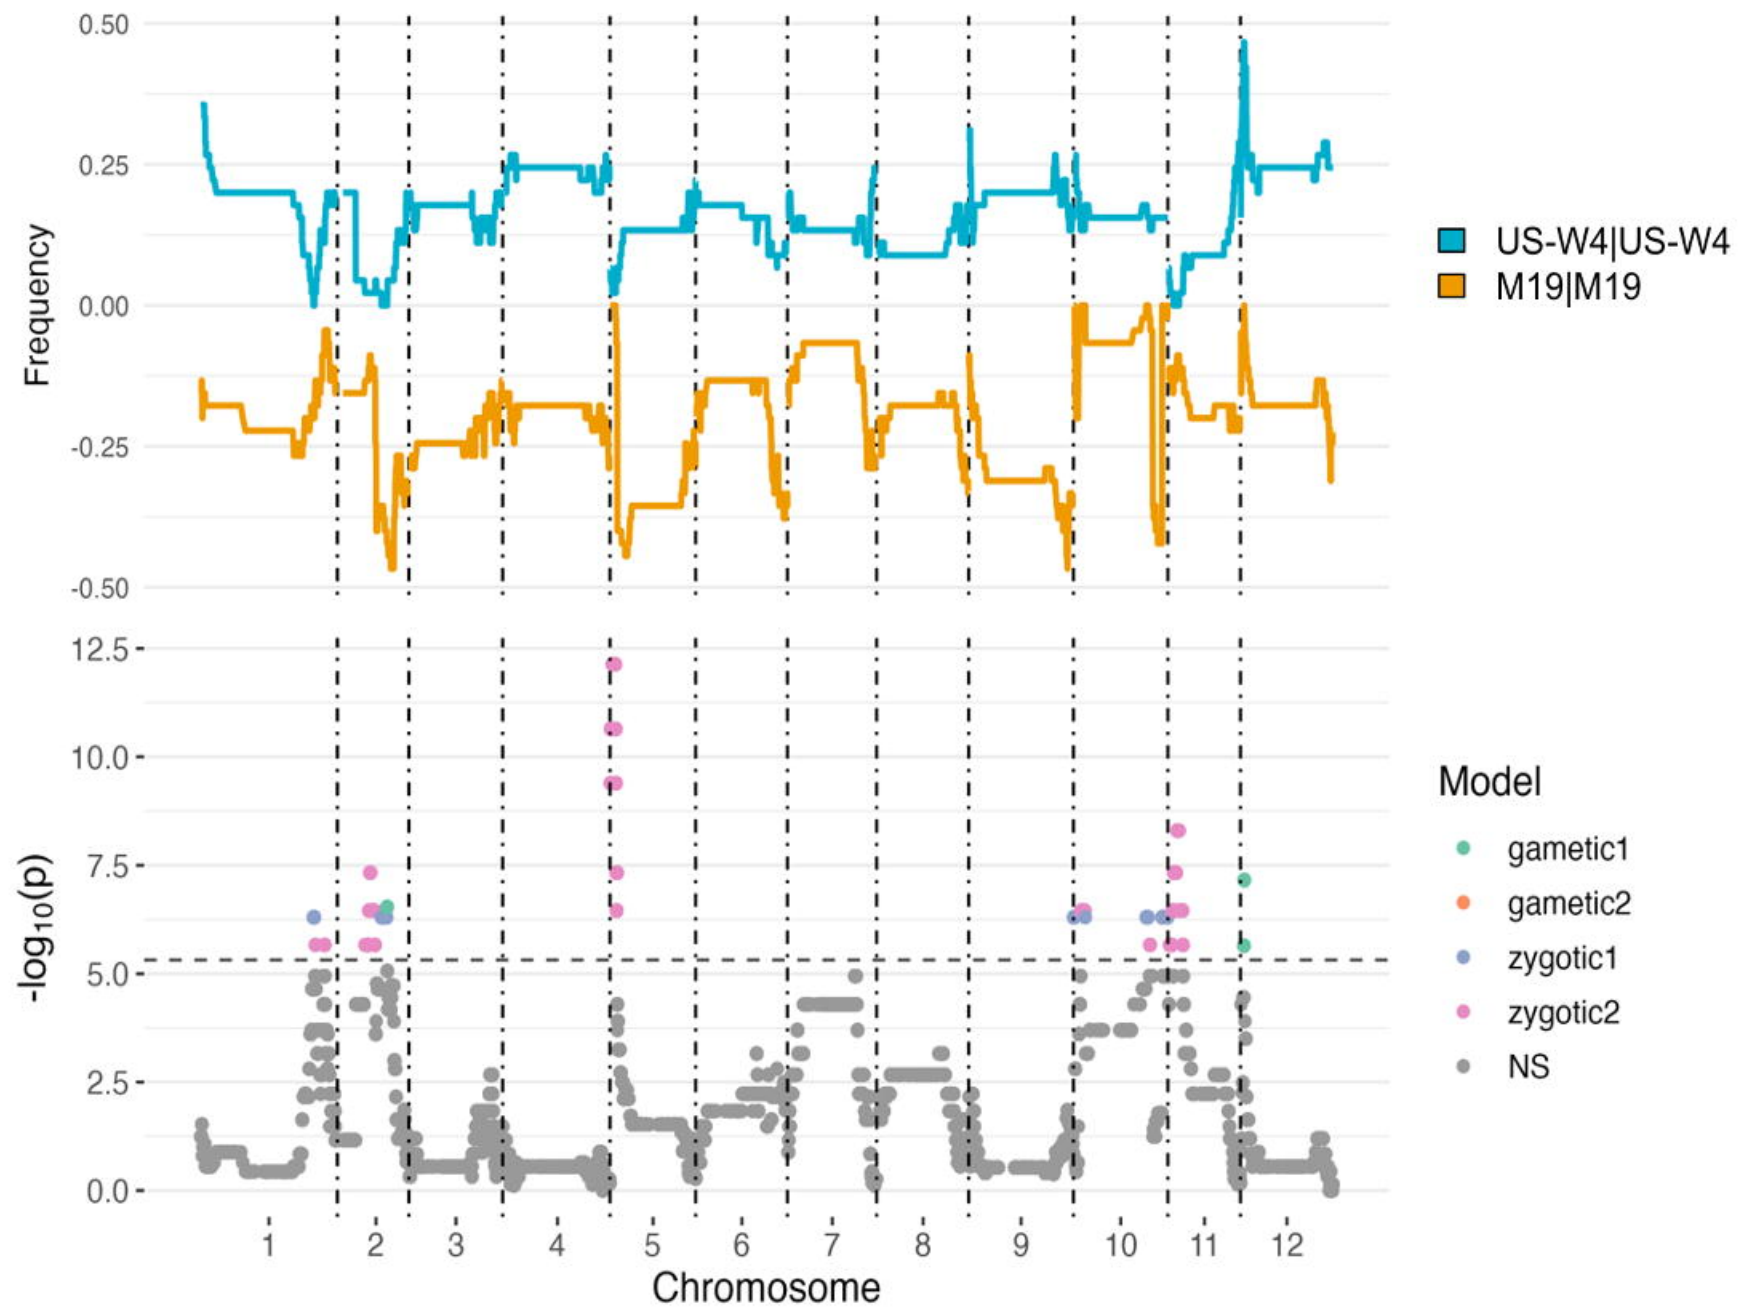

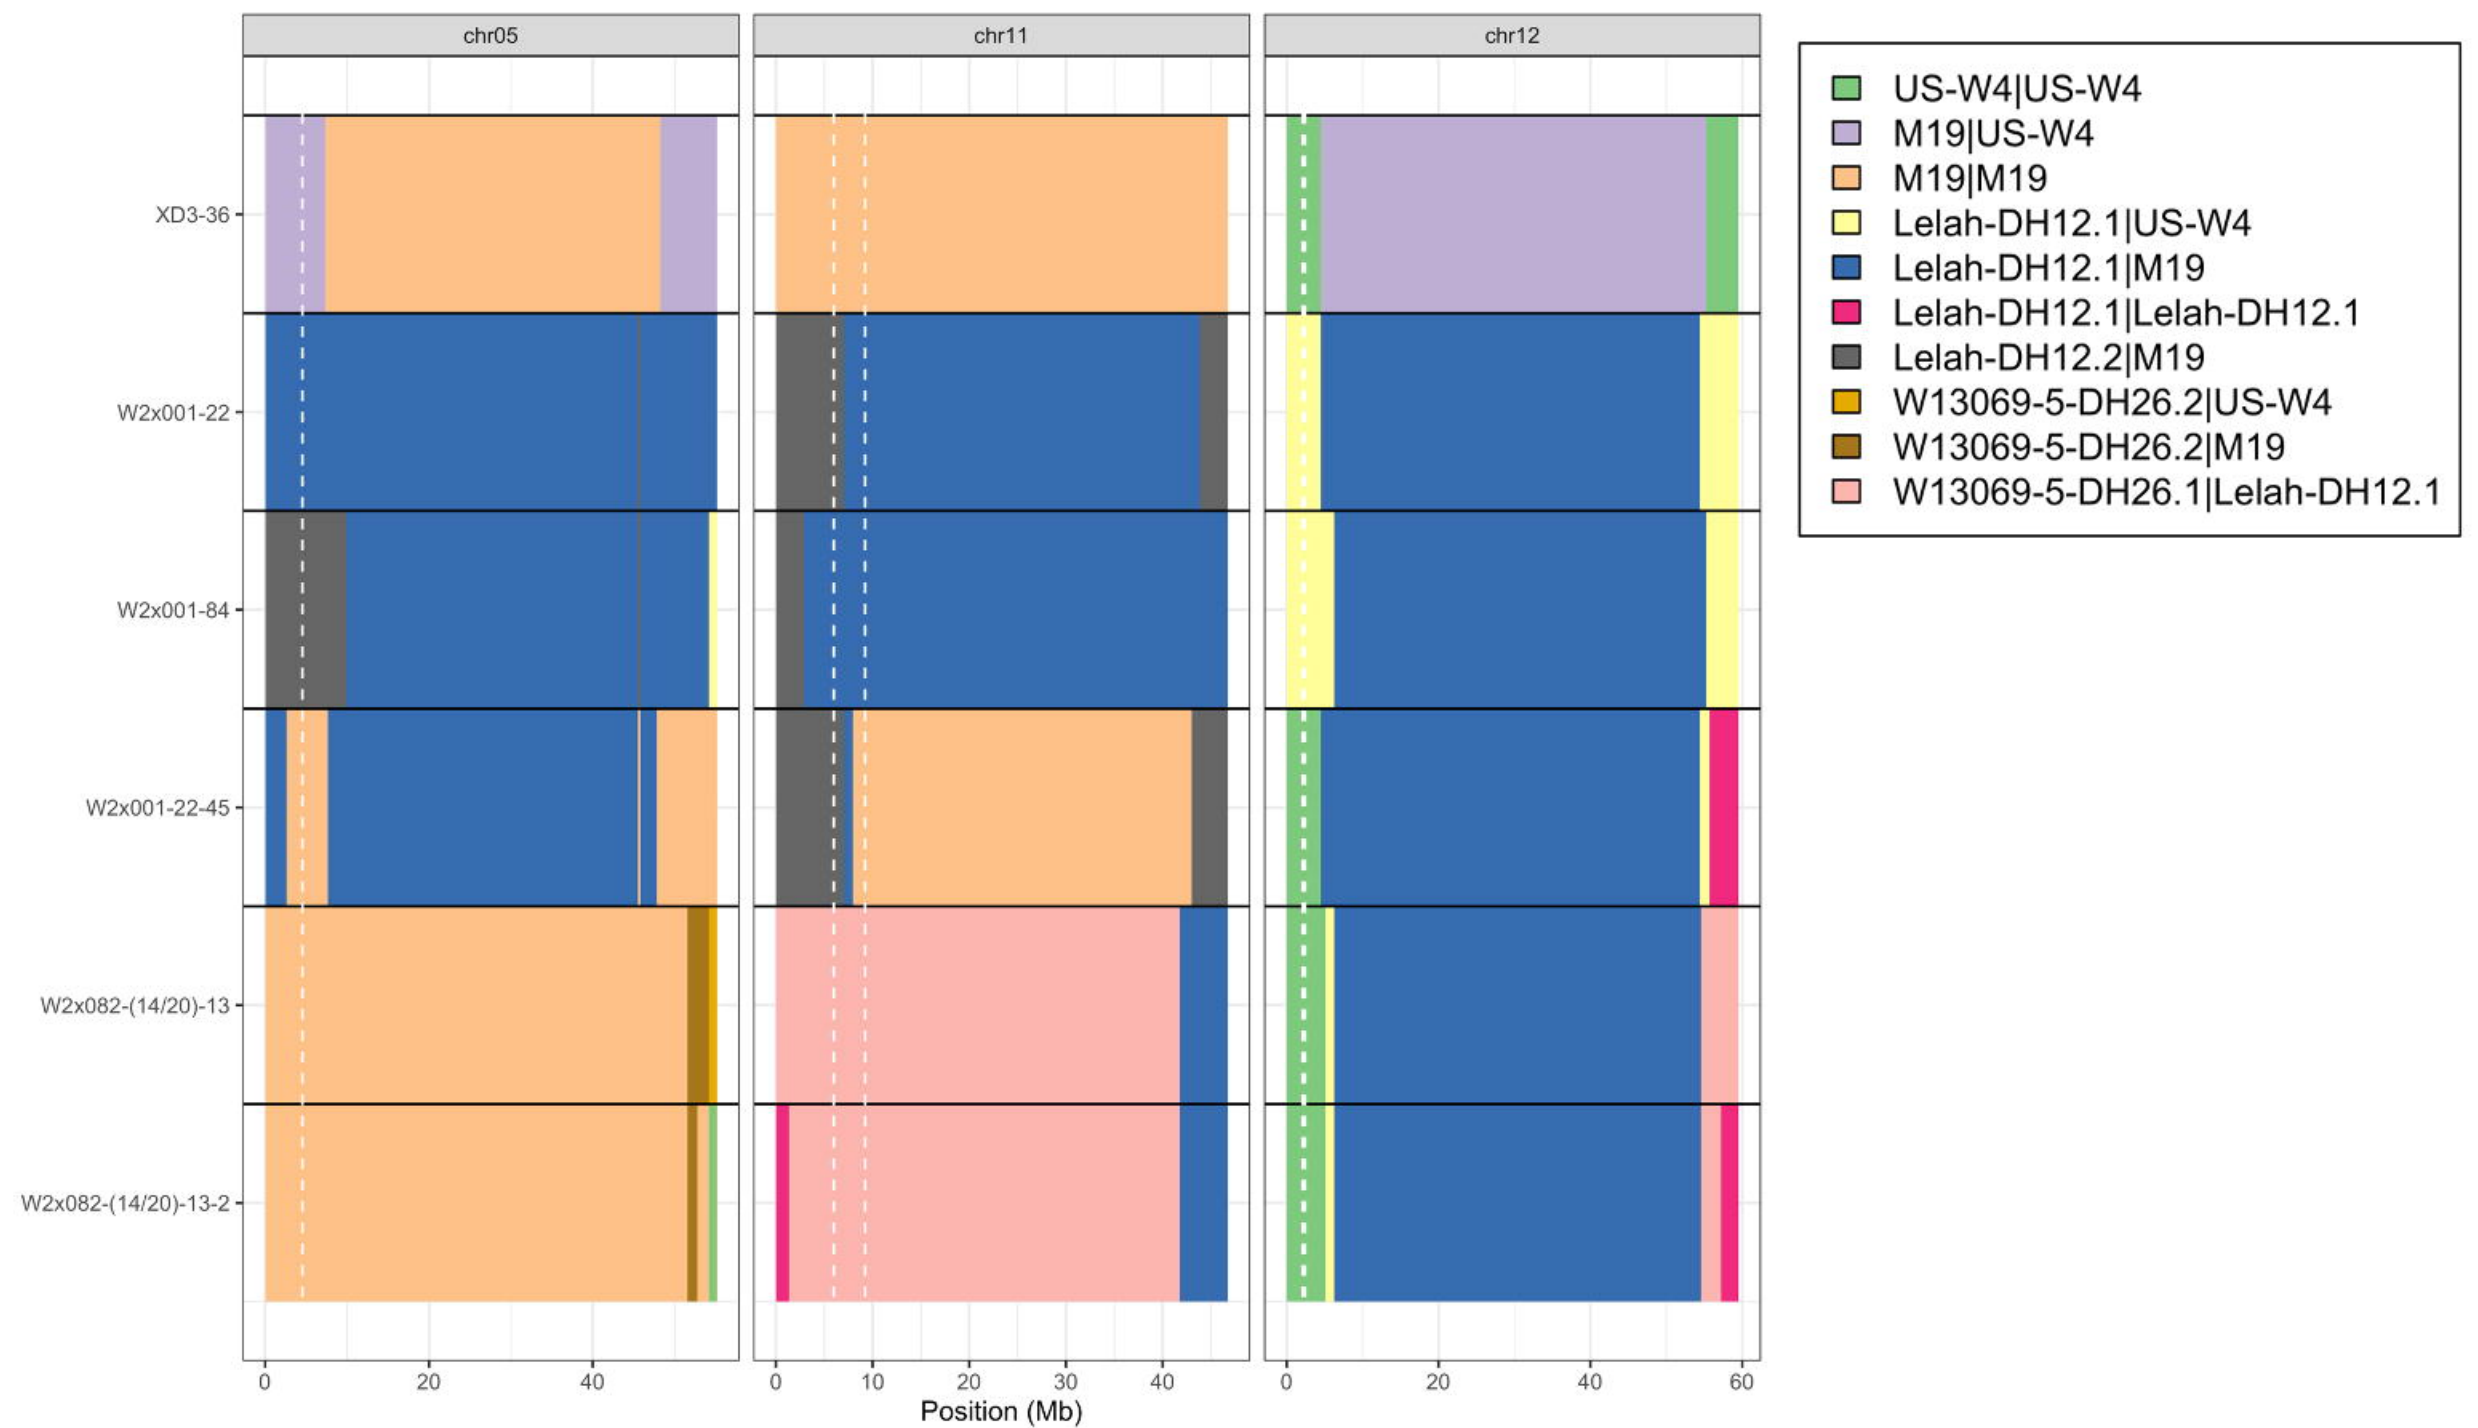

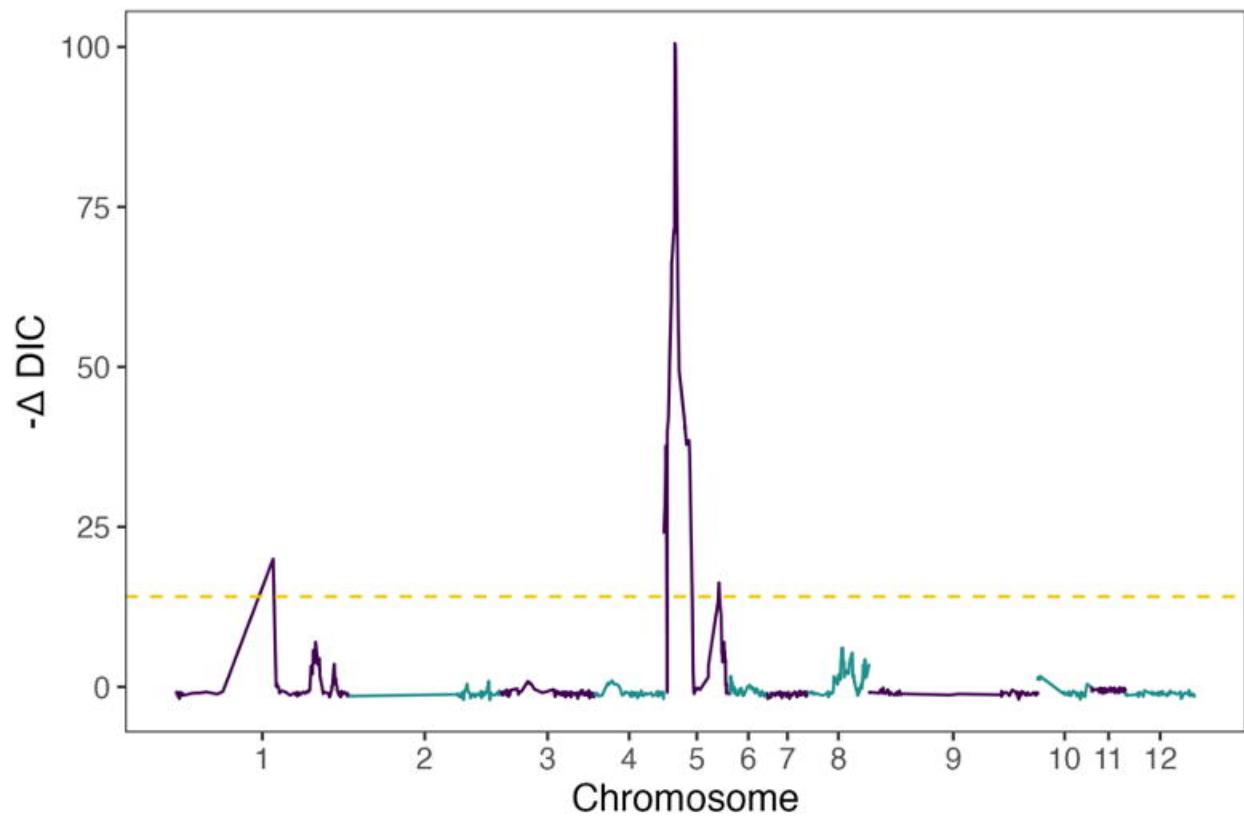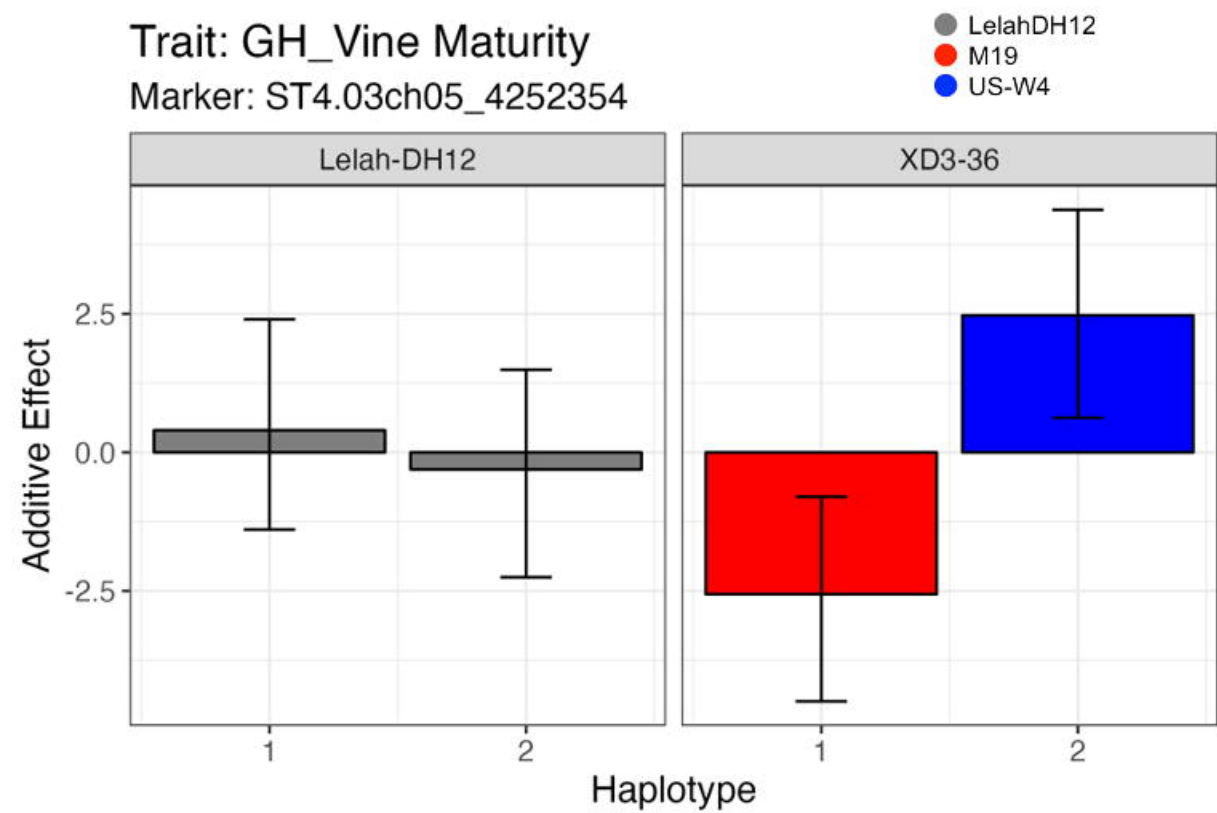



bioRxiv preprint doi: <https://doi.org/10.1101/2022.11.09.513771>; this version posted November 10, 2022. The copyright holder for this preprint (which was not certified by peer review) is the author/funder, who has granted bioRxiv a license to display the preprint in perpetuity. It is made available under aCC-BY 4.0 International license.

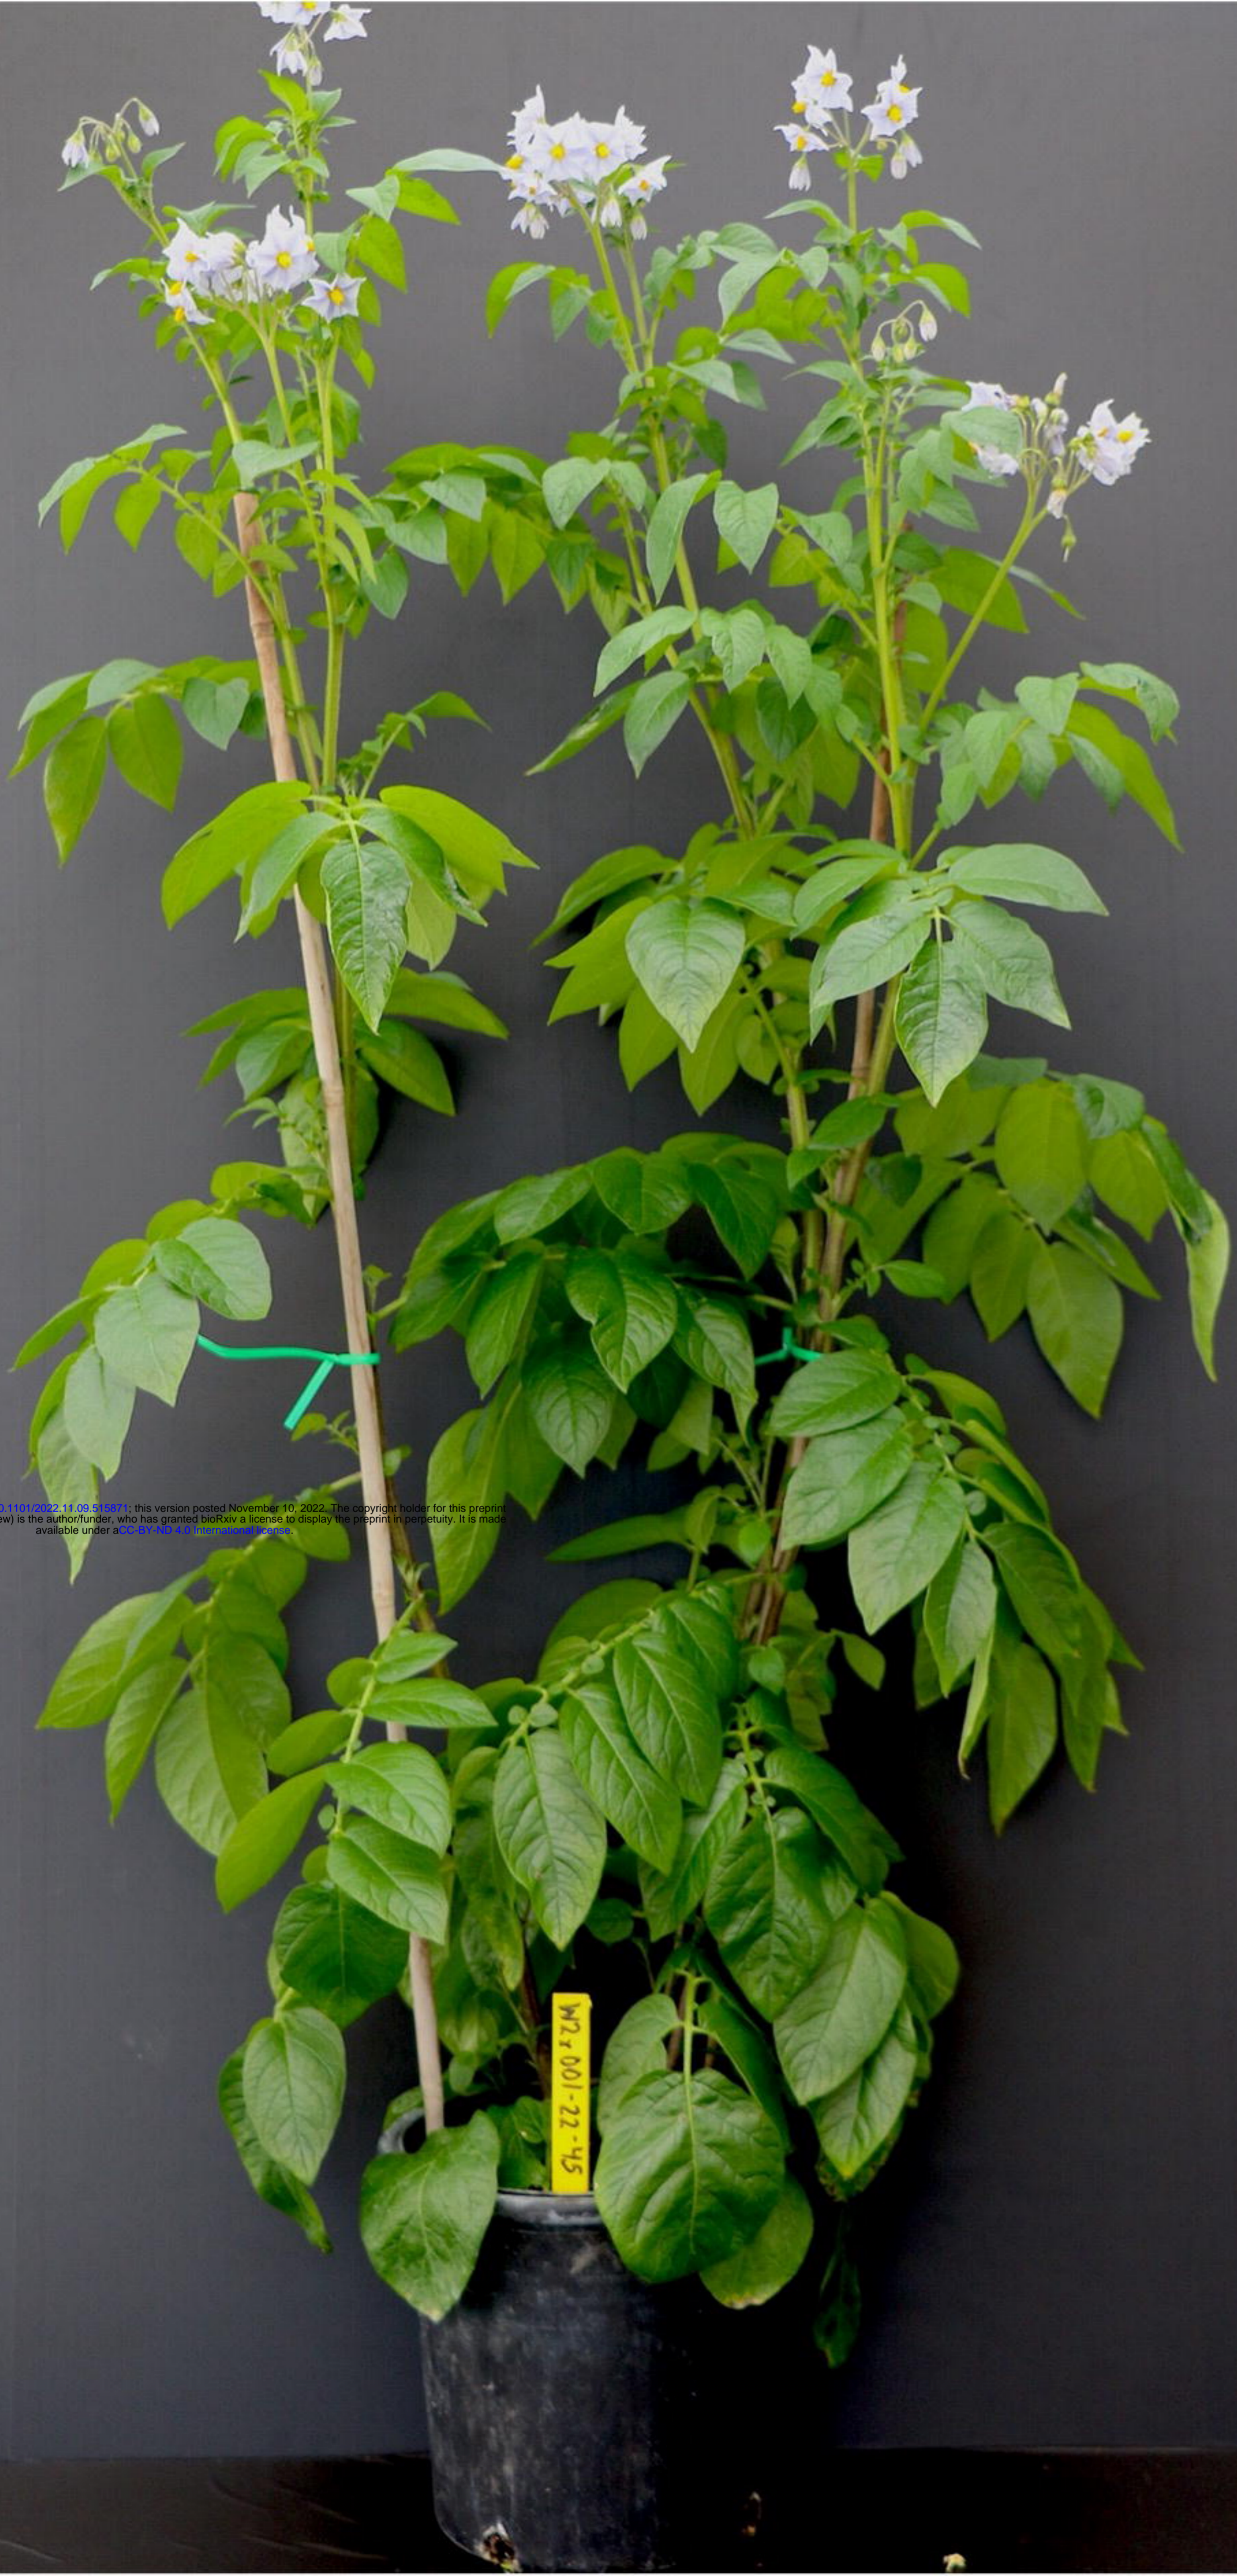

Source: https://www.biorxiv.org/content/10.1101/2022.11.09.515871v1.full.pdf
